# Supplementary material for: Cyclodextrins and Their Polymers Affect Human Serum Albumin’s Interaction with Drugs Used in the Treatment of Pulmonary Infections
Source: MDPI journal article supplement (doi:10.3390/pharmaceutics15061598), 2023-05-25
Supplement: s1 [file s1]

Article

# Cyclodextrins and Their Polymers Affect Human Serum Albumin's Interaction with Drugs Used in the Treatment of Pulmonary Infections

Anna A. Skuredina, Linara R. Yakupova, Tatiana Yu. Kopnova, Irina M. Le-Deygen, Natalya G. Belogurova and Elena V. Kudryashova \*

## Supplementary

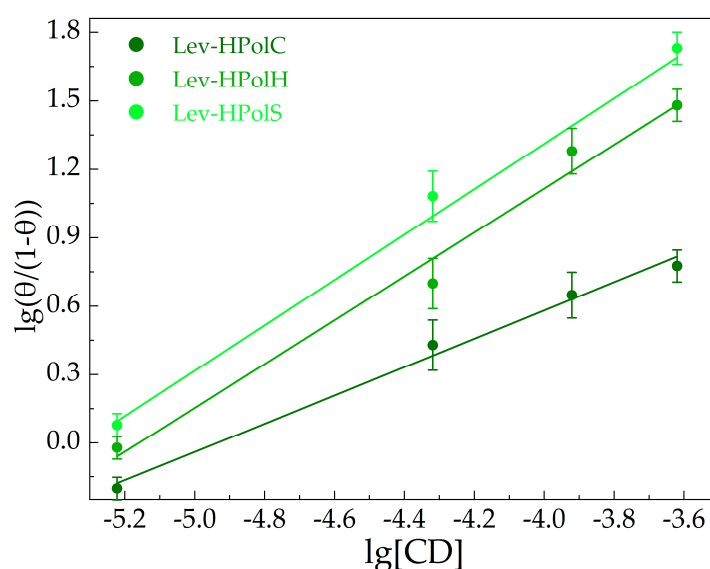

**Figure S1** The linearization of the changes in the Lev's emission spectra intensities via complex formation with CD carriers in Hill's coordinates.

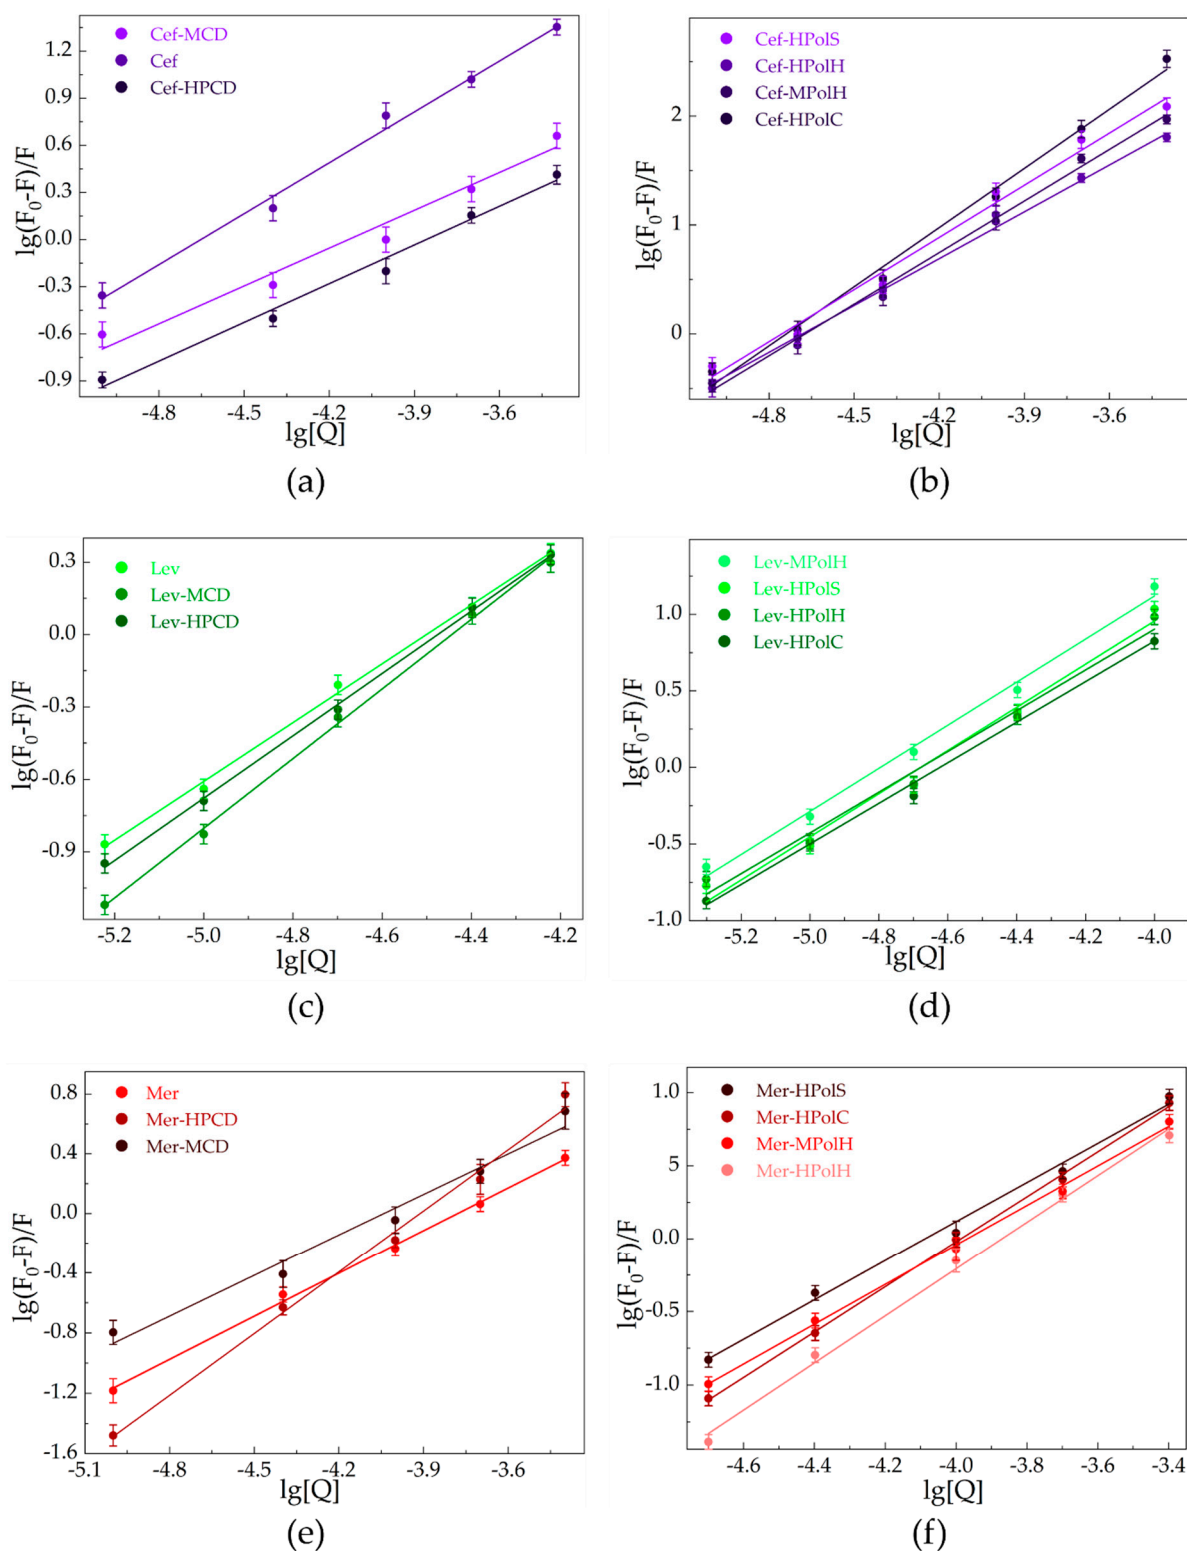

**Figure S2** The determination of  $K_{sv}$  values ( $M^{-1}$ ) for AM-HSA and AM-CDcarrier-HSA by the Stern-Volmer equation, 0.02 M sodium-phosphate buffer solution, pH 7.4, 37 °C.

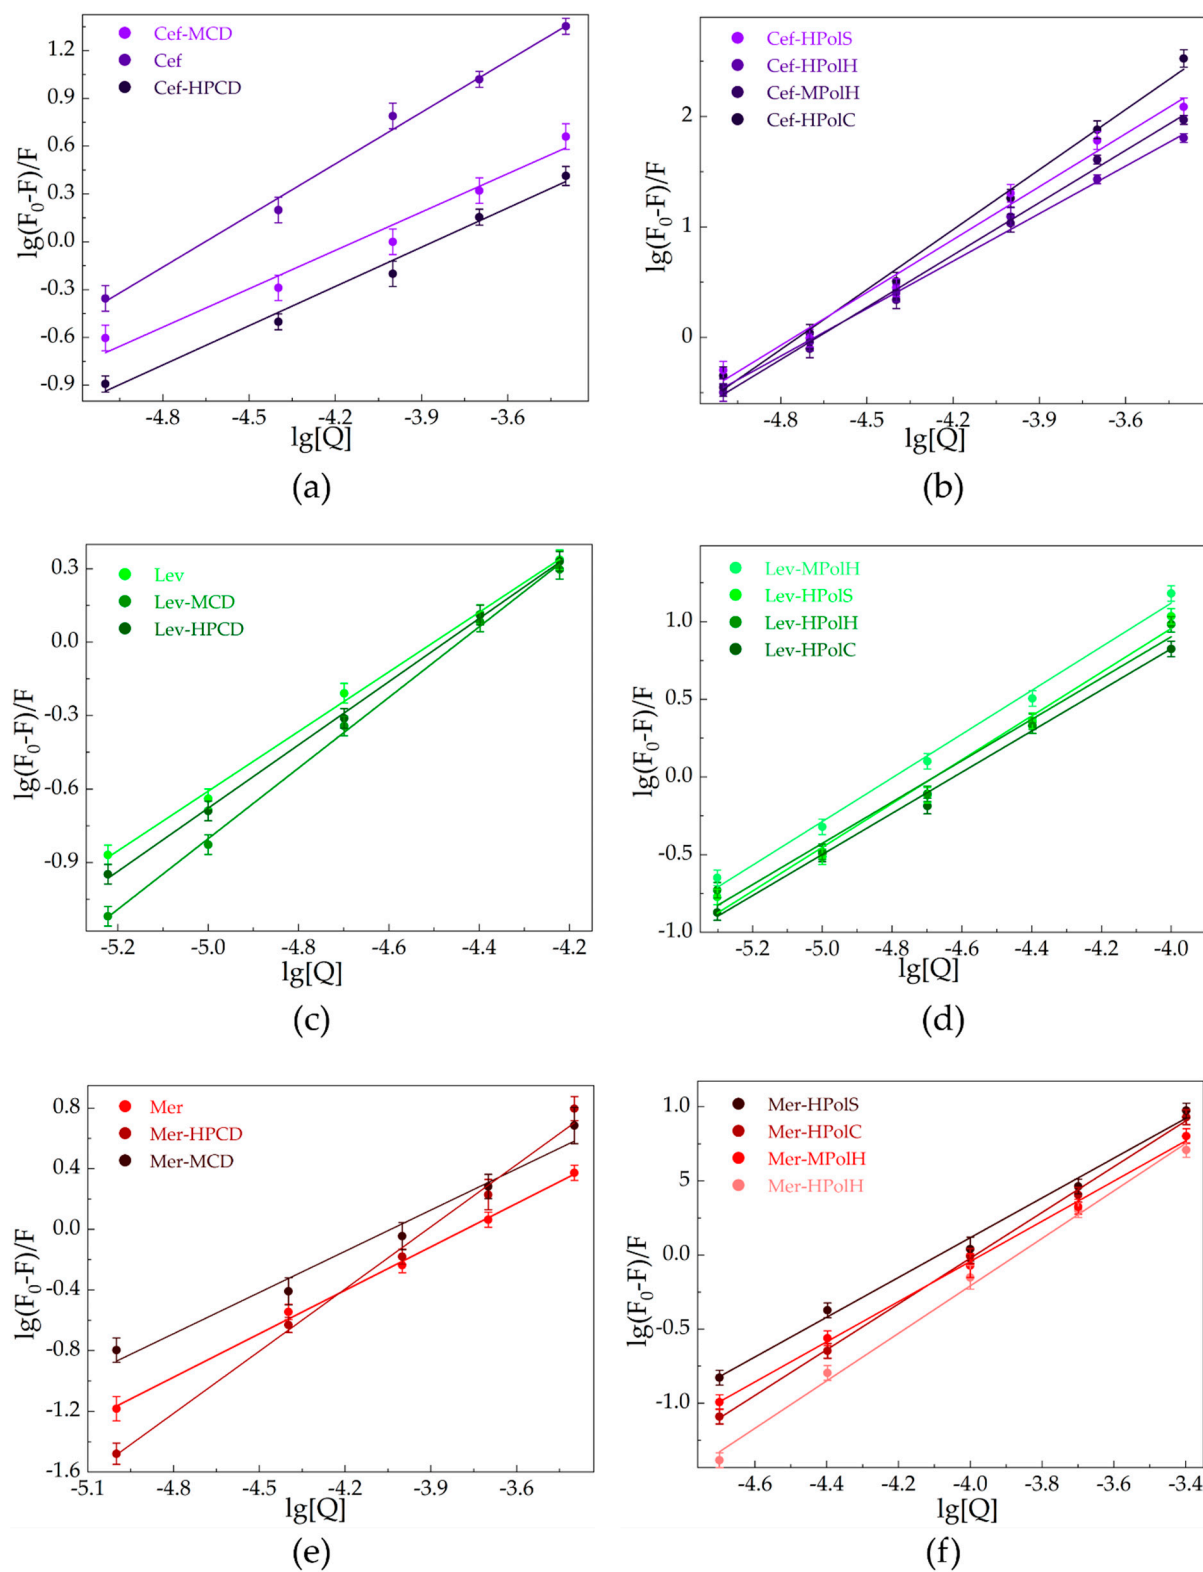

**Figure S3** The determination of  $K_a$  values ( $M^{-1}$ ) for AM-HSA and AM-CDcarrier-HSA, 0.02 M sodium-phosphate buffer solution, pH 7.4, 37 °C.
